# Supplementary material
Source: Springer Nature journal article supplement (https://www.springermedizin.de/resource/supplementary/12889_2009_1742_MOESM2_ESM.pdf/9503864)

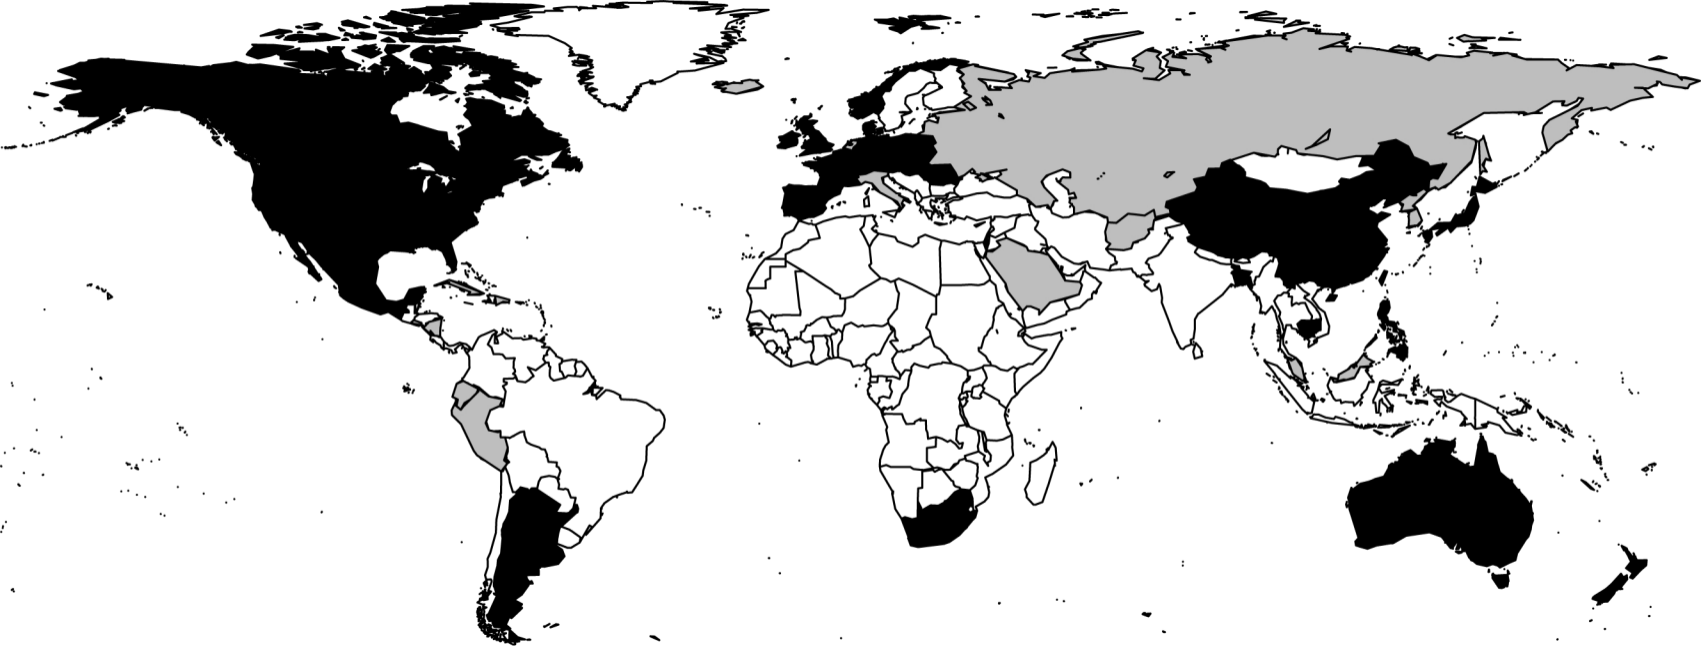

Supplement: MOESM2 [file 9503864]
